# Supplementary material for: FeMnC complex derived from hollow FeMn PBA precursor for highly efficient microwave absorption
Source: Royal Society of Chemistry journal article supplement (doi:10.1039/d3nj01799k), 2023-01-01
Supplement: d3nj01799k1.pdf [file d3nj01799k1.pdf]

## Supporting Materials

### **FeMnC complex derived from hollow FeMn PBA precursor for highly efficient microwave absorption**

Peng Miao,<sup>\*a,c</sup> Weixing Chen,<sup>a</sup> Dong Zhou,<sup>b</sup> Keji Zhu,<sup>a</sup> Jianing Zhang,<sup>a</sup> and Jie Kong<sup>b</sup>

<sup>a</sup> School of Materials and Chemical Engineering, Xi'an Technological University, Xi'an, Shaanxi, 710021, China.

<sup>b</sup> School of Chemistry and Chemical Engineering, Northwestern Polytechnical University, Xi'an, Shaanxi, 710072, China.

<sup>c</sup> Shaanxi Key Laboratory of Artificially-Structured Functional Materials and Devices, Xi'an, Shaanxi, 710043, China.

\*Corresponding Author, E-mail Address: miaopeng@xatu.edu.cn

## Experimental Section

### Materials

All chemical reagents were brought commercially and used without further purification. Potassium ferrocyanide ( $K_3[Fe(CN)_6]$ ) and manganese nitrate tetrahydrate ( $Mn(NO)_3 \cdot 4H_2O$ ) were purchased from Macklin Corp. Sodium citrate ( $C_6H_5Na_3O_7$ ) and polymethyl pyrrolidone (PVP,  $C_5H_9NO$ , K30, Da=40000) were obtained from Aladdin Corp., ethyl alcohol ( $C_2H_5OH$ , AR $\geq$ 98.5%) was brought from GHTECH Corp. The deionized (DI) water was fabricated in Lab.

### Material synthesis

**Synthesis of hollow Fe-Mn PBA precursor.** The as-synthesized hollow Fe-Mn PBA precursors were prepared via a high-efficient coprecipitation and hydrothermal reaction process using a previous synthetic method.<sup>1</sup> Typically, 0.05 mmol of  $K_3[Fe(CN)_6]$  is dissolved in 10 mL of DI water and stirred till a yellow transparent solution A; and 0.15 mmol of  $Mn(NO)_3 \cdot 4H_2O$ , 0.001 mmol of sodium citrate, and 2.0 g of PVP are dissolved in 35 mL of DI water and stirred till a transparent solution B. Then the solution B drops in the solution A in 30 seconds and which forms a dark brown solution C and stirring for 10 mins. Finally, transfer solution C to the oven ageing at 80 °C for 6 hours and a mixture of upper and lower layers in the beaker formed, and filter the upper solution and clean it several times using ethyl alcohol.

**Hollow FeMn PBA precursors derived FeMnC complex.** The as-prepared hollow Fe-Mn PBA boxes were placed on the high-temperature resistant ceramic cup and transferred into a tube furnace (OTF-1200X, Kejing New Mater. Ltd., Hefei, China). The FeMnC complex was obtained by setting the stepwise heating process with a heating rate of 2 °C/min, and was kept at 500-800 °C under an argon atmosphere. The pyrolytic product can be obtained after with a fall rate of 5 °C/min.

**Materials Characterization.** The powder X-ray diffraction (PXRD) data of hollow FeMn PBA precursors was collected by a Rigaku-UltimaIV diffractometer using monochromatized Cu  $K\alpha$  radiation ( $K\alpha_1$ ,  $\lambda=1.540593$  Å) flux at a scanning rate of 10 °min<sup>-1</sup>. The thermogravimetric analysis (TGA) was conducted on a simultaneous thermal device (STA, 449 Jupiter, Netsch, Gerätebau GmbH, Selb, Germany) under a heating rate of 10 °min<sup>-1</sup> from 40 to 1200 °C (Argon, 40 mL min<sup>-1</sup>). The morphology and microstructure were observed using a field scanning electron microscopy (FESEM, FEI, Verios G4) and high-resolution transmission electron microscope (TEM, FEI, Talos F200X)

equipped with a selected area electron diffraction (SAED). The chemical composition and valence state were scanned by X-ray photoelectron spectroscopy (XPS) on a Kratos Axis Ultra DLD equipped with Al K $\alpha$  radiation ( $h\nu=1486.6$  eV) with a scanning voltage of 15 kV, and a scanning current of 10 mA. The magnetic response was surveyed by hysteresis loop using a physical property measurement system (Quantum Design, PPMS, Cryogenic, CFMS-14T).

**Electromagnetic parameters measurement.** The electromagnetic parameters of the FeMnC complex were collected by a vector network analyzer (VNA, Anritsu, MS46322B) using the coaxial transmission line method. The complex (microwave absorbers: paraffin=1:2, wt.%) was pressed into a coaxial ring with an outer diameter ( $\Phi_o$ ) of 7.00 mm and an inner diameter ( $\Phi_i$ ) of 3.04 mm in 2-18 GHz. The reflection loss ( $RL$ ) is calculated by the following equation.

$$Z_{in} = \sqrt{\frac{\mu_r}{\epsilon_r}} \tanh \left[ j \frac{2\pi f d}{c} \sqrt{\mu_r \epsilon_r} \right] \quad (1)$$

$$RL = 20 \log_{10} \left| \frac{Z_{in} - 1}{Z_{in} + 1} \right| \quad (2)$$

$$\left( \epsilon' - \frac{\epsilon_s + \epsilon_\infty}{2} \right) + (\epsilon')^2 = \left( \frac{\epsilon_s - \epsilon_\infty}{2} \right)^2 \quad (3)$$

$$\alpha = \frac{\sqrt{2\pi f}}{c} \times \sqrt{(\mu''\epsilon'' - \mu'\epsilon') + \sqrt{(\mu''\epsilon'' - \mu'\epsilon')^2 + (\mu''\epsilon' - \mu'\epsilon'')^2}} \quad (4)$$

Where  $Z_{in}$ ,  $\mu_r$ , and  $\epsilon_r$  are the normalized input impedance, permeability, and permittivity of the paraffined-based complex, respectively. The  $f$ ,  $d$ , and  $c$  represent the microwave frequency, matching the thickness ( $m$ ) of the sample and the velocity of the microwave in a vacuum, respectively. The  $\epsilon_s$  and  $\epsilon_\infty$  are the static permittivity and relative permittivity.

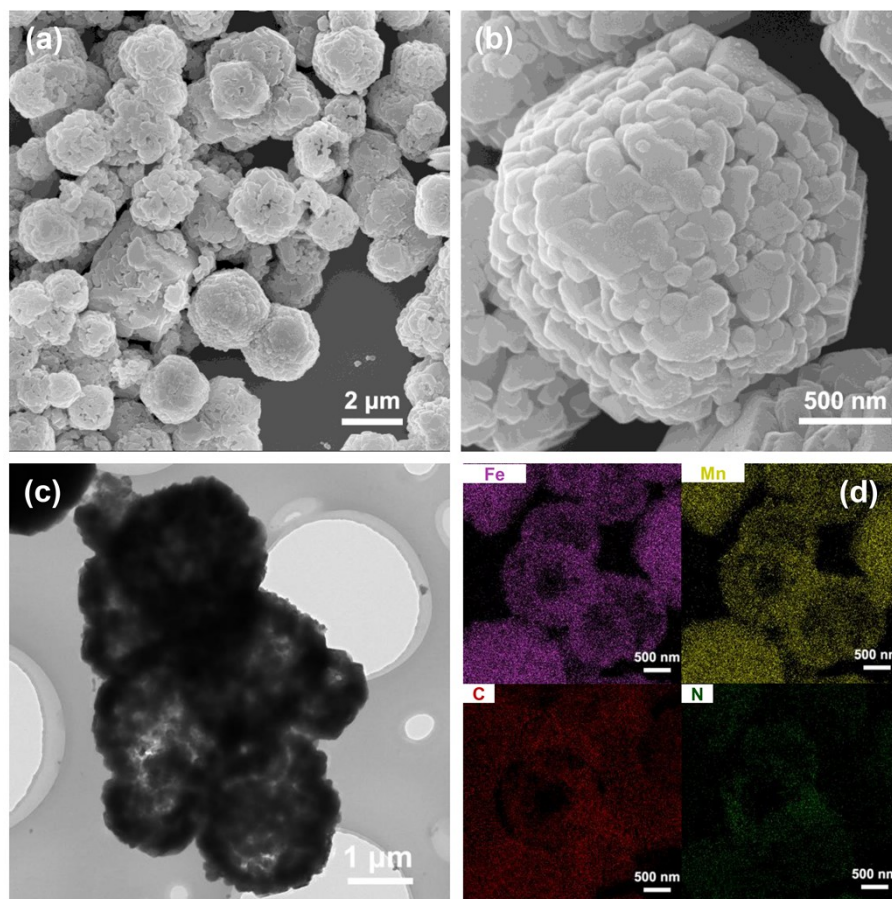

**Figure S1** The microstructure of hollow Fe-Mn PBA precursors. (a) The SEM image, (b) magnifying SEM image, (c) TEM image, and (d) elemental mapping of Fe, Mn, C, and N.

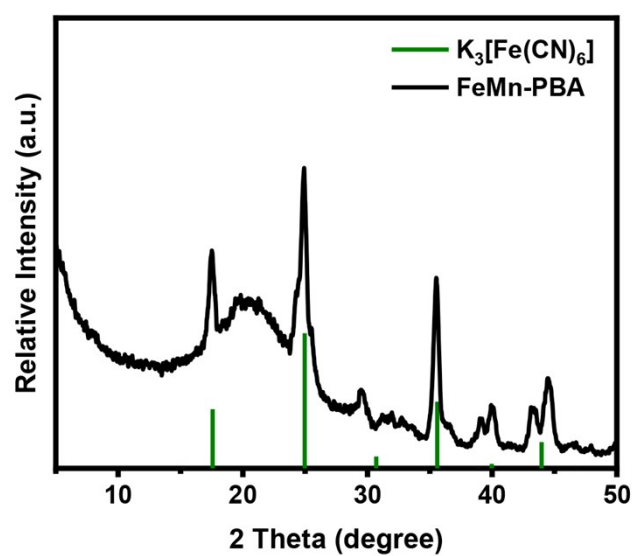

**Figure S2** The phase composition of as-synthesized hollow Fe-Mn PBA precursors. The PXRD pattern.

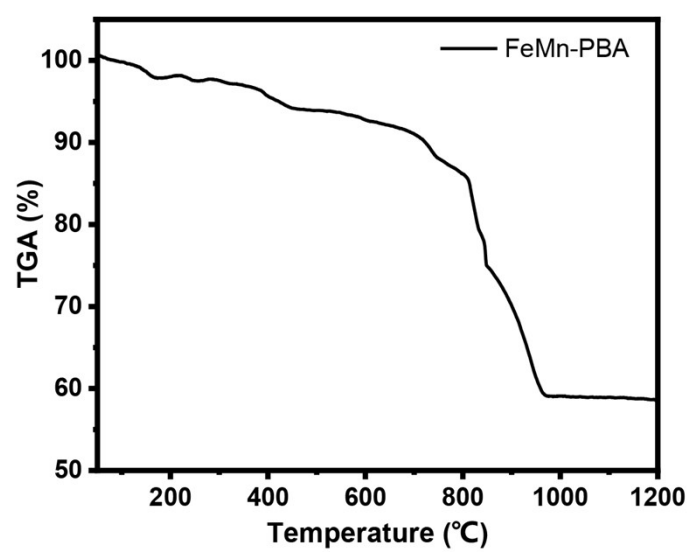

**Figure S3** The thermal stability of as-synthesized hollow Fe-Mn PBA precursors. TGA curve.

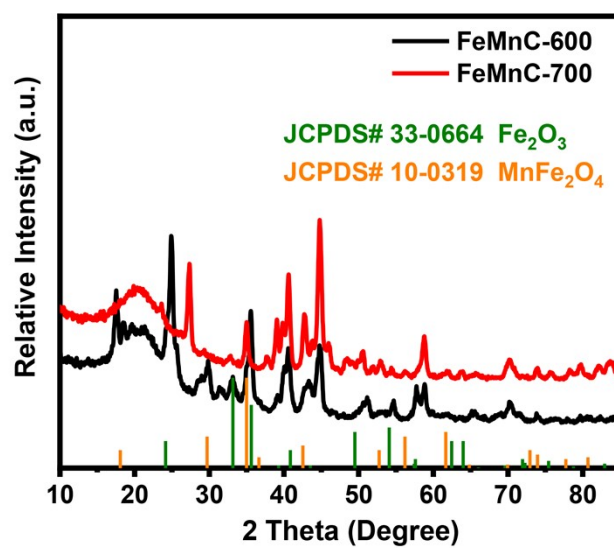

**Figure S4** The powder X-ray diffraction (PXRD) patterns of the FeMnC-600 and FeMnC-700.

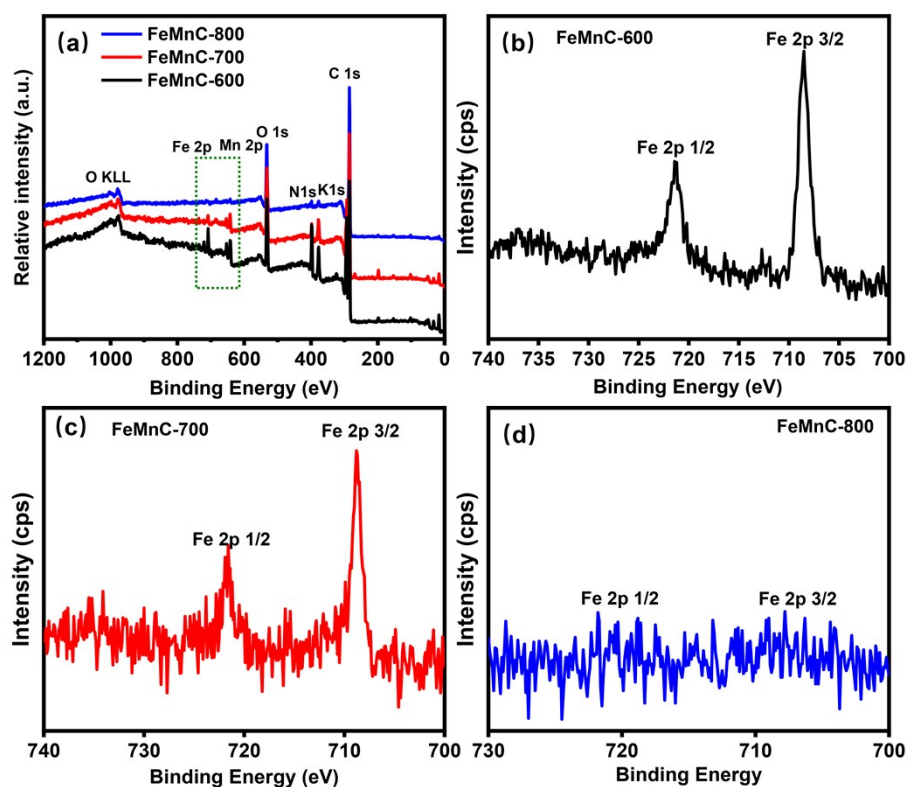

**Figure S5** The chemical composition and valence state of iron for the FeMnC complex. (a) Survey spectra of FeMnC-600, FeMnC-700, and FeMnC-800, Narrow spectra of Fe element for (b) FeMnC-600, (c) FeMnC-700, (d) FeMnC-800.

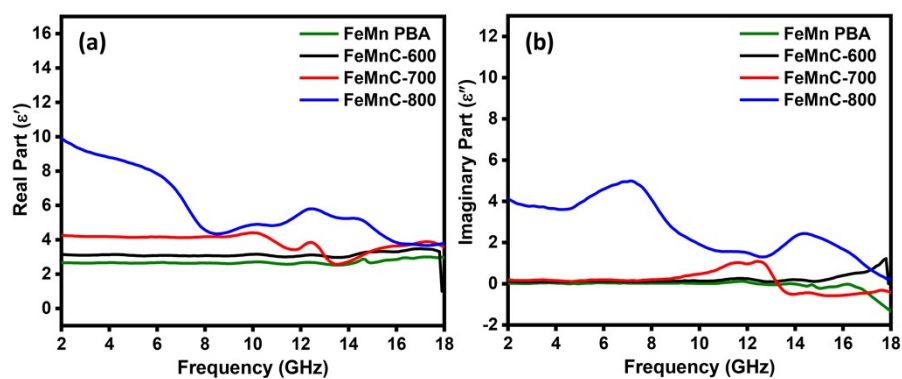

**Figure S6** (a) Real parts ( $\epsilon'$ ) and (b) imaginary parts ( $\epsilon''$ ) of complex permittivity of FeMn PBA, FeMnC-600, FeMnC-700, and FeMnC-800.

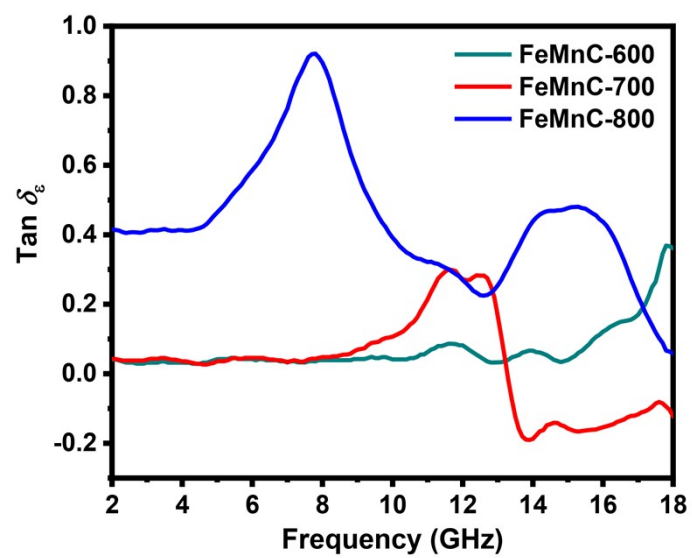

**Figure S7** The tangent value of FeMnC complex with different pyrolysis temperatures (600, 700, and 800 °C)

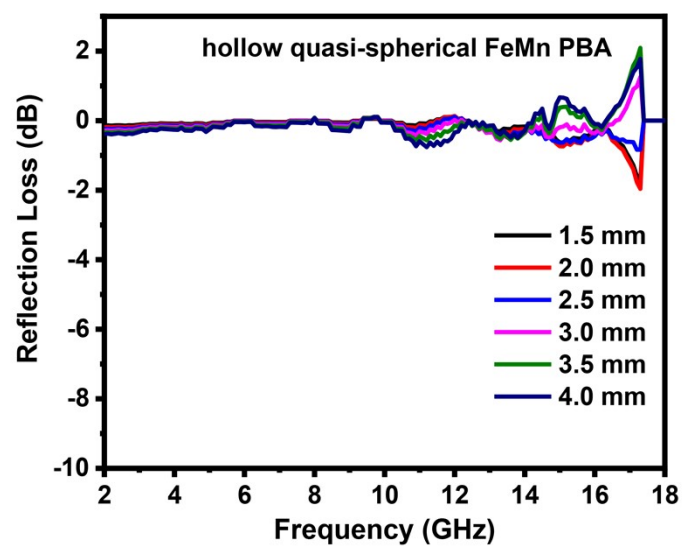

**Figure S8** Reflection loss curves of hollow FeMn PBA precursors.

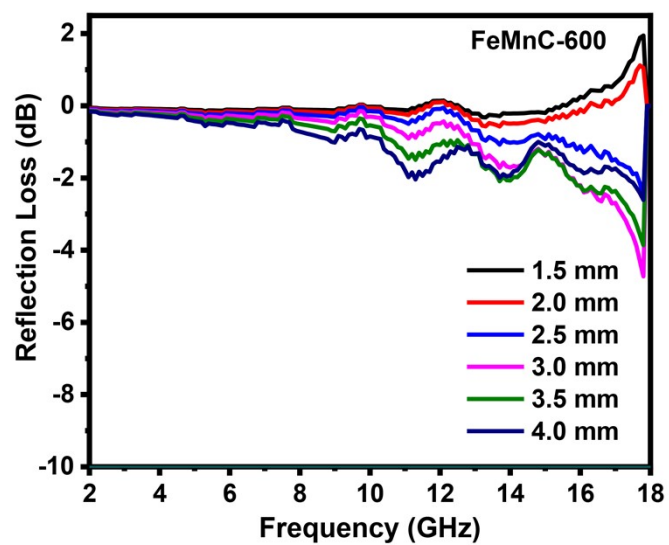

**Figure S9** The reflection loss curves of the FeMnC complexes derived from hollow FeMn Prussian blue analogue (PBA) pyrolyzed at 600 °C.

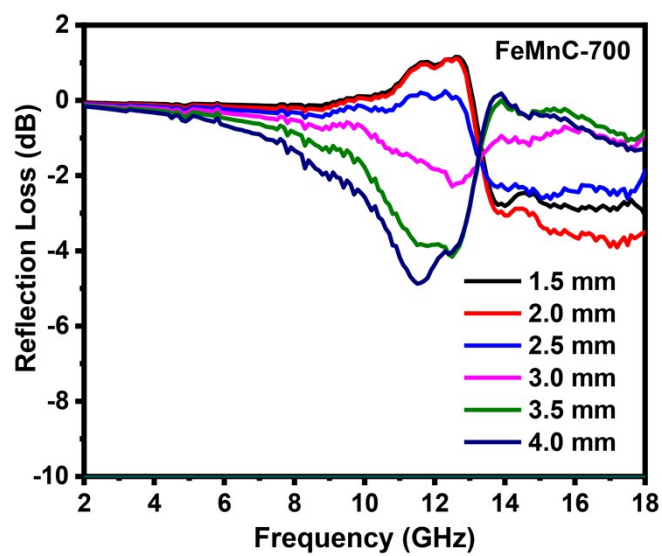

**Figure S10** The reflection loss curves of the FeMnC complexes derived from hollow FeMn Prussian blue analogue (PBA) pyrolyzed at 700 °C.

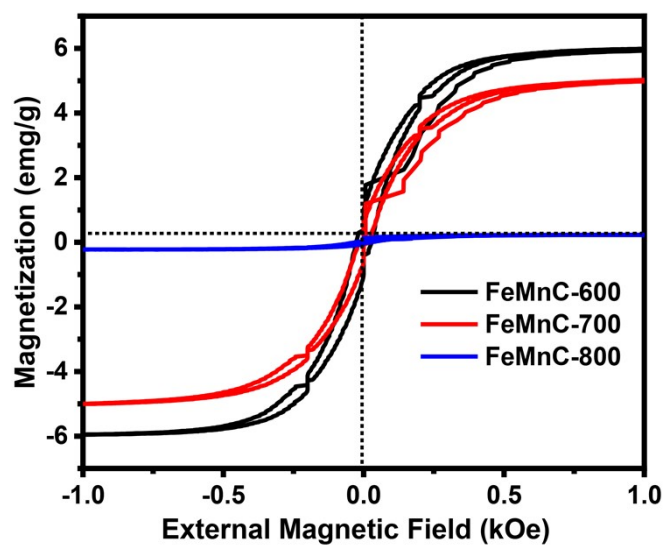

**Figure S11** The hysteresis loops of the FeMnC complex with different pyrolysis temperatures (600, 700, and 800 °C)

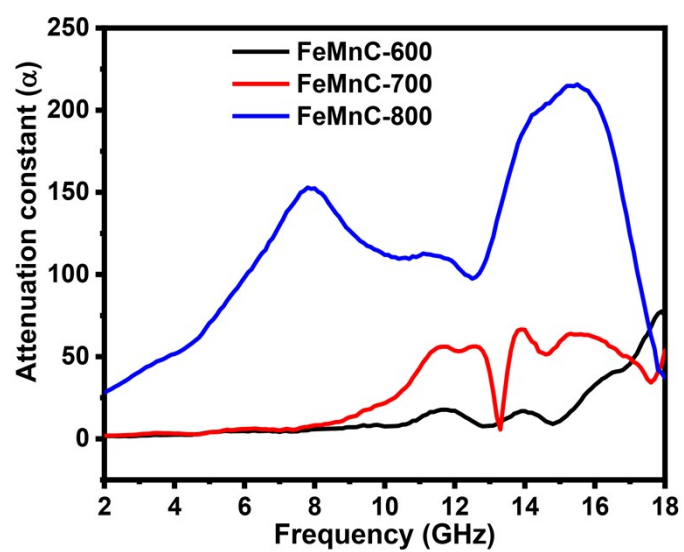

**Figure S12** The microwave attenuation constant ( $\alpha$ ) of the FeMnC complex with different pyrolysis temperatures (600, 700, and 800°C).

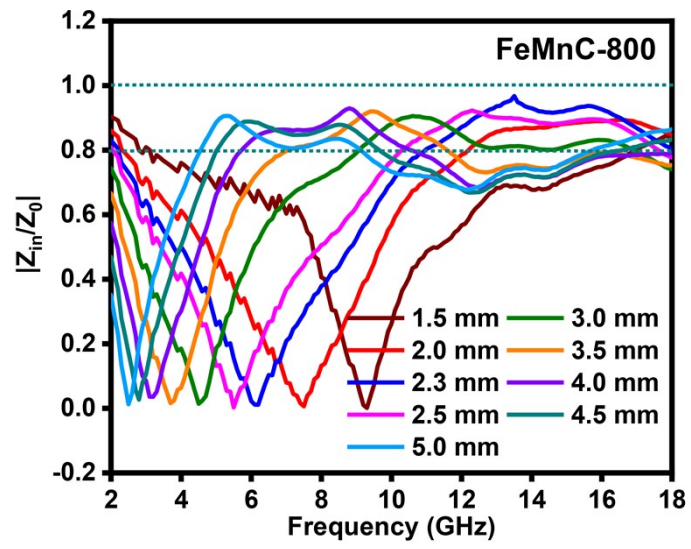

**Figure S13** The normalized input impedance of the FeMnC-800.

**Table S1** The microwave absorption properties of previously reported PBA-deriving complex as microwave absorbents.

| Absorbers                | Optimal<br>thickness<br><br>(mm) | Optimal<br>RL (dB) | Effective absorption |       | Loading/<br><br><i>wt%</i> | Ref.      |
|--------------------------|----------------------------------|--------------------|----------------------|-------|----------------------------|-----------|
|                          |                                  |                    | bandwidth (<-10 dB)  |       |                            |           |
|                          |                                  |                    | thickness            | EAB   |                            |           |
|                          |                                  |                    | (mm)                 | (GHz) |                            |           |
| CoNi@graphite@carbon     | 2.0                              | -56.78             | 2.0                  | 5.51  | 30                         | 2         |
| CoAl/CoFe-CoCx@NC        | 3.8                              | -82.1              | 2.4                  | 5.6   | 50                         | 3         |
| Fe/C (PB)                | 2.0                              | -20.3              | 2.0                  | 7.2   | 40                         | 4         |
| FeCo Alloy               | 2.0                              | -33                | 1.5                  | 4.6   | 40                         | 5         |
| Core-shell FeCo@carbon   | 2.0                              | -67.8              | 2.0                  | 5.3   | 50                         | 6         |
| hollow NiCo@C            | 2.14                             | -68.4              | 2.0                  | 5.8   | 40                         | 7         |
| CoFe/C                   | 2.15                             | -44.6              | 2.15                 | 5.5   | 60                         | 8         |
| Fe/Co/C nanocomplex      | 2.0                              | -54.6              | 2.5                  | 8.8   | 33                         | 1         |
| PB@MoS <sub>2</sub>      | 2.1                              | -42.84             | 2.4                  | 7.31  | 40                         | 9         |
| CoFe/C(ZIF-67/PBA)       | 5.8                              | -44.1              | 2.3                  | 5.2   | 60                         | 10        |
| FeCoNi alloy(FeCoNi-PBA) | 1.91                             | -67                | 2.68                 | 6.6   | 30                         | 11        |
| Core Shell NiCoFe/N-C    | 2.0                              | -57.5              | 2.0                  | 5.44  | -                          | 12        |
| Fe/Mn/C-800              | 2.3                              | -60.3              | 2.3                  | 6.4   | 30                         | this work |

## References:

- 1 P. Miao, J. Chen, Y. Tang, K.-J. Chen and J. Kong, *Sci. China Mater.*, 2020, **63**, 2050-2061.
- 2 X. Wu, W. Ma, J. Xu, P. He, Y. Du, Y. Zhang, P. Zuo, H. Qi and Q. Zhuang, *ACS Appl. Nano Mater.*, 2022, **5**, 7300-7311.
- 3 X. Zeng, T. Nie, C. Zhao, G. Zhu, X. Zhang, R. Yu, G. D. Stucky and R. Che, *ACS Appl. Mater. Interfaces*, 2022, **14**, 41235-41245.
- 4 R. Qiang, Y. C. Du, H. T. Zhao, Y. Wang, C. H. Tian, Z. G. Li, X. J. Han and P. Xu, *J. Mater. Chem. A*, 2015, **3**, 13426-13434.
- 5 D. Liu, R. Qiang, Y. Du, Y. Wang, C. Tian and X. Han, *J. Colloid Interf. Sci.*, 2018, **514**, 10-20.
- 6 F. Y. Wang, N. Wang, X. J. Han, D. W. Liu, Y. H. Wang, L. R. Cui, P. Xu and Y. C. Du, *Carbon*, 2019, **145**, 701-711.
- 7 L. Cui, Y. Wang, X. Han, P. Xu, F. Wang, D. Liu, H. Zhao and Y. Du, *Carbon*, 2021, **174**, 673-682.
- 8 X. H. Liang, G. H. Wang, W. H. Gu and G. B. Ji, *Carbon*, 2021, **177**, 97-106.
- 9 Z. X. Zhao, S. W. Xu, Z. J. Du, C. Jiang and X. Z. Huang, *ACS Sustain. Chem. Eng.*, 2019, **7**, 7183-7192.
- 10 S. Wei, T. Chen, Q. Wang, Z. C. Shi, W. Li and S. G. Chen, *J. Colloid Interf. Sci.*, 2021, **593**, 370-379.

- 11 P. Li, Y. Zhao, Y. Zhao, J. Yan, H. Zhao, W. Zhao, J. Yun, C. Chen, Z. Deng and Z. Zhang, *Compos. Part B: Eng.*, 2022, **246**, 110268.
- 12 Y. J. Wang, Z. B. Pang, H. Xu, C. P. Li, W. J. Zhou, X. H. Jiang and L. M. Yu, *J. Colloid Interf. Sci.*, 2022, **620**, 107-118.
